# Supplementary material for: Comparison of Physical and Compositional Attributes between Commercial Plant-Based and Dairy Yogurts
Source: MDPI journal article supplement (doi:10.3390/foods13070984), 2024-03-23
Supplement: s1 [file s1]

Supplemental Table S1

| S.No | Brand        | Base    | Flavor              | Ingredients                                                                                                                                                                                                                                                                                                                                     |
|------|--------------|---------|---------------------|-------------------------------------------------------------------------------------------------------------------------------------------------------------------------------------------------------------------------------------------------------------------------------------------------------------------------------------------------|
| 1    | Oatly        | Oat     | Plain               | Oatmilk (Water, Oats), Low Erucic Acid Rapeseed Oil, Potato Starch. Contains 2% Or Less Of: Dextrose, Pea Protein, Potato Protein, Calcium Carbonate, Guar Gum, Tricalcium Phosphate, Locust Bean Gum, Live Active Cultures ( <i>S. Thermophilus</i> , <i>L. Bulgaricus</i> , <i>L. Casei</i> , <i>L. Acidophilus</i> , and <i>B. Lactis</i> ). |
| 2    | Kite Hill    | Almond  | Vanilla             | Almond Milk (Water, Almonds), Cane Sugar, Starch, Citrus Fiber, Natural Flavors, Vanilla Extract, Locust Bean Gum, Citric Acid, Xanthan Gum, Vanilla Bean Seeds, Live Active Cultures                                                                                                                                                           |
| 3    | Kite Hill    | Almond  | Plain               | Almond Milk (Water, Almonds), Locust Bean Gum, Xanthan Gum, Agar, Live Active Cultures.                                                                                                                                                                                                                                                         |
| 4    | Oui          | Coconut | Vanilla             | Coconut Base (Water, Coconut Cream, Cane Sugar, Modified Food Starch, Natural Flavor, Tricalcium Citrate, Malic Acid, Vanilla Extract, Vitamin D2), Cultures.                                                                                                                                                                                   |
| 5    | Silk         | Almond  | Vanilla             | Almond Milk (Water, Almonds), Cane Sugar, Water, Pectin, Natural Flavors, Calcium Citrate, Calcium Phosphate, Citric Acid, Vanilla Bean Specks, Live And Active Cultures, Vitamin D2. Live And Active Cultures: <i>S. Thermophilus</i> , <i>L. Bulgaricus</i> , <i>L. Acidophilus</i> , <i>B. Lactis</i> .                                      |
| 6    | Silk         | Soy     | Vanilla             | Soymilk (Water; Soybeans), Cane Sugar, Corn Starch, Pectin, Tricalcium Phosphate, Citric Acid, Natural Flavor, Dipotassium Phosphate, Sea Salt, Vanilla Bean, Live and Active Cultures, Mixed Tocopherols and Vitamin C Ester (To Protect Freshness), Vitamin D2.                                                                               |
| 7    | So Delicious | Coconut | Unsweetened Vanilla | Organic Coconut Milk (filtered Water, Organic Coconut Cream), Vitamin And Mineral Blend (calcium Phosphate, Magnesium Phosphate, Calcium Carbonate, L-selenomethionine [selenium], Vitamin A Acetate, Vitamin D2, Zinc Oxide, Vitamin B12), Organic Sunflower Lecithin, I Gellan Gum, Natural Flavor, Organic Locust Bean Gum, Sea Salt.        |
| 8    | So Delicious | Coconut | Vanilla             | Organic Coconut Milk (Filtered Water, Organic Coconut Cream), Organic Cane Sugar, Rice Starch, Contains 2% Or Less Of: Natural Flavor, Calcium Citrate, Pectin, Locust Bean Gum, Citric Acid, Live And Active Cultures, Vitamin D2, Vitamin B12.                                                                                                |
| 9    | So Delicious | Coconut | Unsweetened Plain   | Organic Coconut Milk (Filtered Water; Organic Coconut Cream), Rice Starch, Contains 2% or Less of: Pectin, Calcium Phosphate, Dipotassium Phosphate, Live and Active Cultures, Locust Bean Gum, Vitamin D2, Vitamin B12                                                                                                                         |
| 10   | Forager      | Cashew  | Vanilla Bean        | Cashew Milk (Filtered Water, Cashews*), Cane Sugar*, Tapioca Starch*, Pectin, Locust Bean Gum*, Natural                                                                                                                                                                                                                                         |

|    |                  |            |         |                                                                                                                                                                                                                                                                                                                                                                                 |
|----|------------------|------------|---------|---------------------------------------------------------------------------------------------------------------------------------------------------------------------------------------------------------------------------------------------------------------------------------------------------------------------------------------------------------------------------------|
|    |                  |            |         | Flavor*, Vanilla Beans*, Lemon Juice Concentrate*, Coconut Cream*, Live Active Cultures. (*ORGANIC). Live Active Cultures: <i>S. Thermophilus</i> , <i>L. Bulgaricus</i> , <i>L. Acidophilus</i> , <i>Bifidus</i> , <i>L. Lactis</i> , <i>L. Plantarum</i> .                                                                                                                    |
| 11 | Forager          | Cashew     | Plain   | Cashew milk (filtered Water, Cashews*), Tapioca Starch*, Locust Bean Gum*, Coconut Cream*, Live Active Cultures.                                                                                                                                                                                                                                                                |
| 12 | Almond Breeze    | Almond     | Vanilla | Almond milk (filtered Water, Almonds), Sugar, Tapioca Starch, Pectin, Natural Flavors, Vanilla Extract, Agar, Calcium Phosphate, Salt, Locust Bean Gum, Sodium Citrate, Calcium Lactate and Cultures.                                                                                                                                                                           |
| 13 | Chobani          | Oat        | Vanilla | Oat Blend* (Water, Whole Grain Oats*), Cane Sugar*, Water, Pea Protein*, Tapioca Flour, Less Than 2% Of: Coconut*, Vanilla Extract, Sunflower Oil*, Natural Flavors, Fruit Pectin, Lemon Juice Concentrate*, Locust Bean Gum*, Cultures, *Organic Ingredients                                                                                                                   |
| 14 | Brown Cow        | Whole Milk | Plain   | Cultured Pasteurized Whole Milk, Pectin                                                                                                                                                                                                                                                                                                                                         |
| 15 | Brown Cow        | Whole Milk | Vanilla | Cultured Pasteurized Whole Milk, Pectin                                                                                                                                                                                                                                                                                                                                         |
| 16 | Dannon           | Whole Milk | Plain   | Cultured Grade A Milk                                                                                                                                                                                                                                                                                                                                                           |
| 17 | Noosa            | Whole Milk | Vanilla | Grade A Pasteurized Whole Milk, Cane Sugar, Vanilla Blend (Cane Sugar, Water, Tapioca Starch, Vanilla Extract, Vanilla Bean, Natural Flavor, Pectin, Lemon Juice Concentrate), Wildflower Honey, Kosher Gelatin, Pectin, Live Active Cultures. Live Active Cultures: <i>S. Thermophilus</i> , <i>L. Bulgaricus</i> , <i>L. Acidophilus</i> , <i>Bifidus</i> , <i>L. Casei</i> . |
| 18 | Stony Field      | Whole Milk | Plain   | Cultured Pasteurized Organic Whole Milk, Pectin, Vitamin D3. 6 Live Active Cultures: <i>S. Thermophilus</i> , <i>L. Bulgaricus</i> , <i>L. Acidophilus</i> , <i>Bifidus</i> , <i>L. Paracasei</i> and <i>L. Rhamnosus</i> .                                                                                                                                                     |
| 19 | Stony Field      | Whole Milk | Vanilla | Cultured Pasteurized Organic Whole Milk, Organic Cane Sugar, Organic Natural Vanilla Flavor, Pectin, Lactase Enzyme, Vitamin D3                                                                                                                                                                                                                                                 |
| 20 | Nature's Promise | Whole Milk | Plain   | Cultured Pasteurized Grade A Organic Milk, Pectin, Vitamin D3 Added. Live & Active Cultures: <i>L. Acidophilus</i> , <i>Bifidus</i> , <i>L. casei</i> .                                                                                                                                                                                                                         |
| 21 | 365              | Whole Milk | Vanilla | Cultured Pasteurized Organic Whole Milk, Organic Cane Sugar, Organic Natural Vanilla Flavor, Pectin, Vitamin D3, Contains Live and Active Cultures: <i>S. Thermophilus</i> , <i>L. Bulgaricus</i> , <i>L. Acidophilus</i> , <i>Bifidus</i> , <i>L. Paracasei</i> , <i>L. Rhamnosus</i>                                                                                          |
